# Supplementary material
Source: PubMed Central journal article supplement (PMC7293623)
Supplement: pnas.1912075117.sapp.pdf [file pnas.1912075117.sapp.pdf]

1 Supplementary Information for

2

3 **Protein Phosphatase 2A promotes stomatal development by stabilizing**  
4 **SPEECHLESS in *Arabidopsis***

5

6

7 Chao Bian<sup>1,2,#</sup>, Xiaoyu Guo<sup>1,#</sup>, Yi Zhang<sup>3</sup>, Lu Wang<sup>1,2</sup>, Tongda Xu<sup>3</sup>, Alison DeLong<sup>4</sup>  
8 and Juan Dong<sup>1,2\*</sup>,

9 <sup>1</sup> The Waksman Institute of Microbiology, Rutgers, the State University of New  
10 Jersey; Piscataway, NJ

11 <sup>2</sup> Department of Plant Biology, Rutgers, the State University of New Jersey, New  
12 Brunswick, NJ

13 <sup>3</sup> FAFU-Joint Centre, Horticulture and Metabolic Biology Centre, Haixia Institute of  
14 Science and Technology. Fujian Agriculture and Forestry University, Fuzhou, Fujian  
15 350002, P. R. China

16 <sup>4</sup> Department of Molecular Biology, Cell Biology and Biochemistry, Brown University,  
17 Providence, RI

18

19 # Equal contribution

20 \*Correspondence should be addressed to J.D. ([dong@waksman.rutgers.edu](mailto:dong@waksman.rutgers.edu))

21

22

23

24

25 **This PDF file includes:**

26

27 Figs. S1 to S7

28 Table S1

29

30

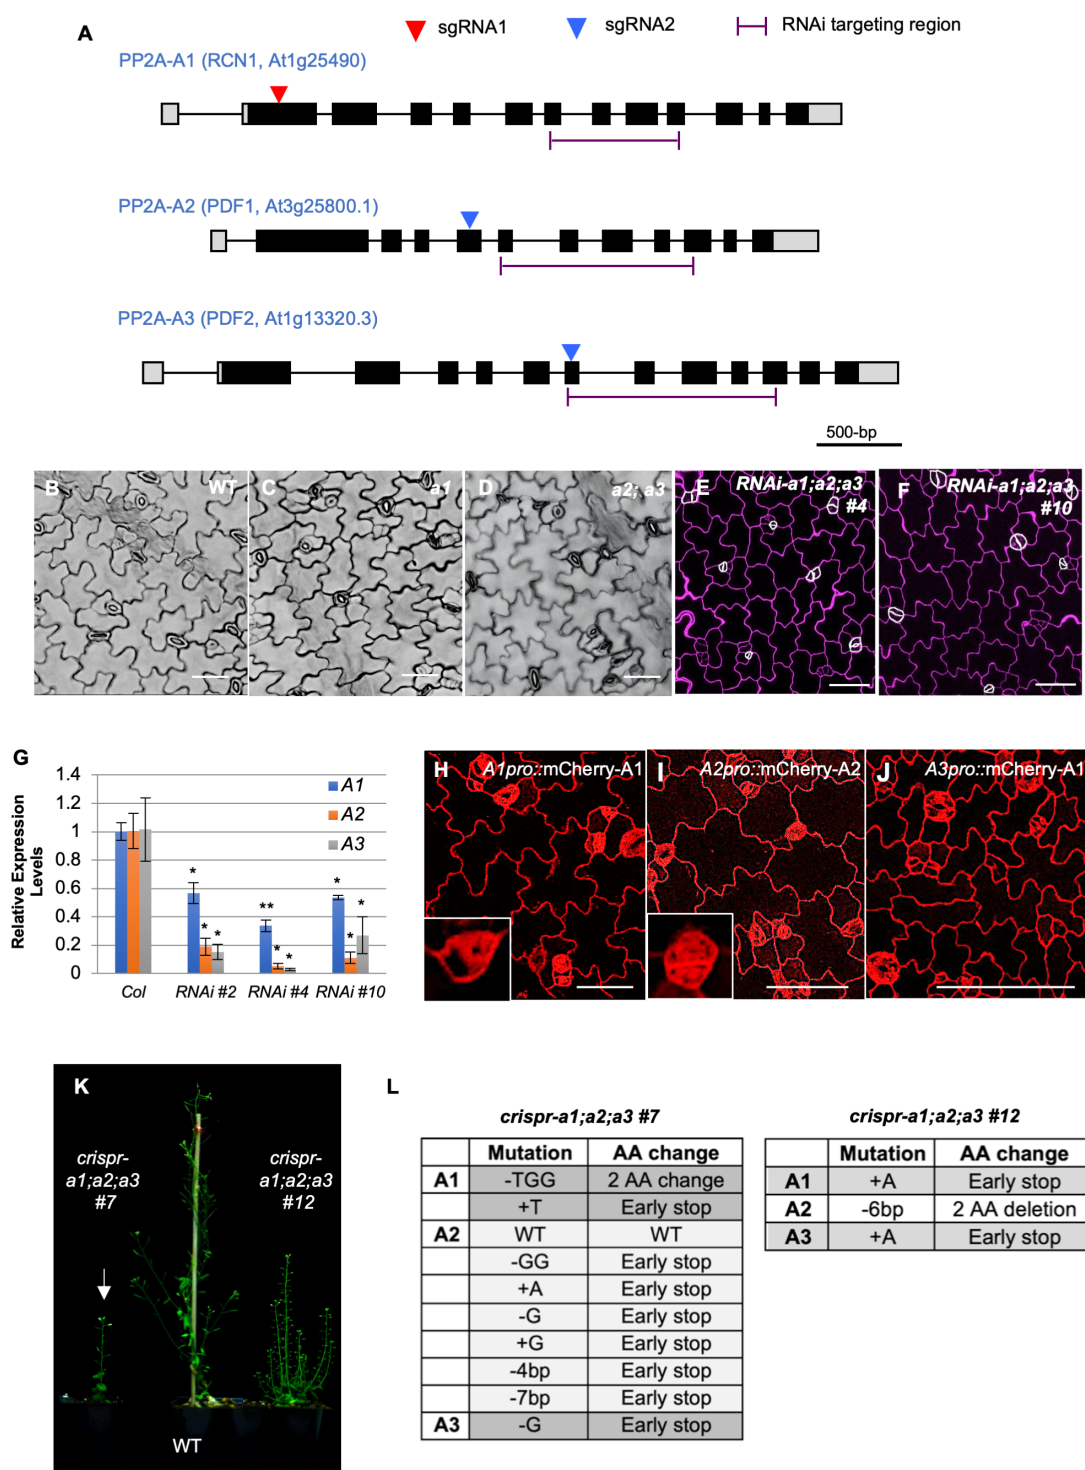

32

33

34 **Fig. S1. Stomatal phenotypes and genetic characterization of *pp2a-a* mutants**

35 (A) Gene structure of three *PP2A*-As with exons (black boxes), introns (lines) and

36 UTRs (gray boxes). Sites targeted by sgRNA1 and sgRNA2 are indicated by red and

37 blue triangles, respectively. RNAi targeting sites are indicated by purple lines. (B-D)

38 DIC images of 5-dpg adaxial side cotyledons of WT (B), *a1* (C), and *a2;a3* (D)

39 seedlings. (E-F) Confocal images of 3-dpg cotyledon epidermis in *RNAi-a1;a2;a3* #4  
40 (E) and #10 (F). Guard cells are manually traced with white highlights to improve  
41 visibility. Cell outlines are visualized by PI staining (magenta).(G) Quantitative real-  
42 time PCR analysis for transcript levels of *A1*, *A2* and *A3* in 5-dpg seedlings. *ACTIN2*  
43 was used as an internal reference. Three biological replicates were performed. Data  
44 are mean  $\pm$  SD. \*significantly different compared to the WT (Col) values (Student's *t*-  
45 test, \*P < 0.05, \*\*P < 0.001). (H-J) Confocal images of 3-dpg adaxial epidermis of  
46 cotyledons expressing *A1pro::mCherry-A1* (H), *A2pro::mCherry-A2* (I), and  
47 *A3pro::mCherry-A1* (J). (K) Comparison of adult plant morphology of Col, T1  
48 individuals of *crispr-a1;a2;a3* #7 and #12. (L) Mutations detected (and the resulting  
49 predicted amino acid changes) in T2 plants of *crispr-a1;a2;a3* #7 and #12. Genotype  
50 data for *crispr-a1;a2;a3* plants were obtained as described in the Methods. Scale  
51 bars represent 50  $\mu$ m.  
52  
53

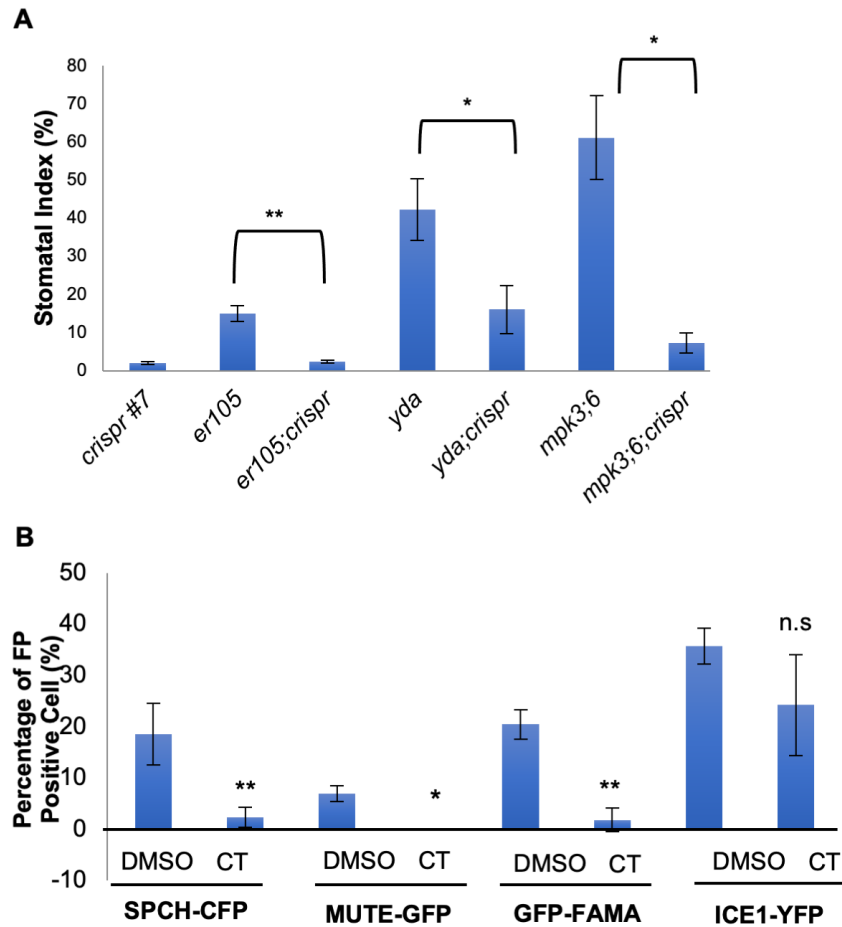

54

55

56 **Fig. S2. Quantification of stomatal phenotype and bHLH expression in**  
 57 **response to CT treatment.**

58 (A) Quantification of stomatal index (SI) in 3-dpg adaxial side cotyledons of  
 59 the indicated genotypes. Data are mean  $\pm$  SD. n=546-3858 cells. Student's *t*-test, \*P  
 60 < 0.05, \*\*P < 0.001. (B) Quantification of percentage of fluorescence-positive cells in  
 61 3-dpg cotyledons of SPCH-CFP, MUTE-GFP, GFP-FAMA, and SCR/ICE1-YFP  
 62 grown on 1/2 MS medium with DMSO or 50  $\mu$ M CT. n=774-8112 cells from 10-12  
 63 individual plants. Data are mean  $\pm$  SD. \*significantly different from the DMSO control  
 64 values (Student's *t*-test, \*P < 0.05, \*\*P < 0.001). n.s: non-significant.

65

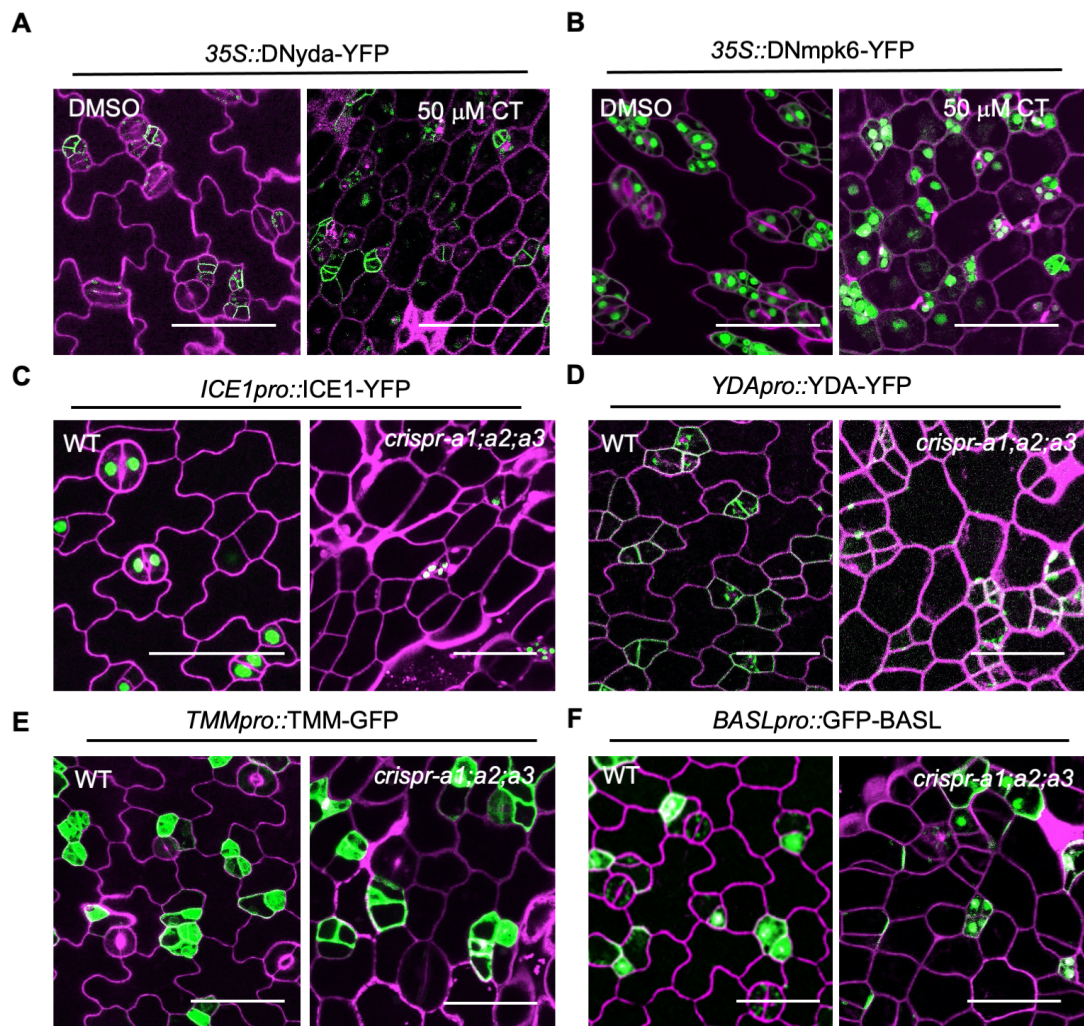

67

68

69 **Fig. S3. Expression patterns of stomatal regulators when PP2A activities are**  
 70 **defective.**

71 (A-B) Confocal images of 3-dpg cotyledons in 35S::DNyda-YFP (A) and  
 72 35S::DNmpk6-YFP (B) seedlings grown on 1/2 MS medium with DMSO (left panels)

73 or 50 μM CT (right panels). (C-F) Confocal images of 3-dpg seedlings expressing

74 SCRM/ICE1-YFP (C), YDA-YFP (D), TMM-GFP (E) and GFP-BASL (F) in the WT

75 (left panels) and *crispr-a1;a2;a3* backgrounds (right panels). Cell outlines are

76 visualized by propidium iodide (PI) staining (magenta) and GFP/YFP are shown in

77 green. Scale bars represent 50 μm.

78

79

80

81

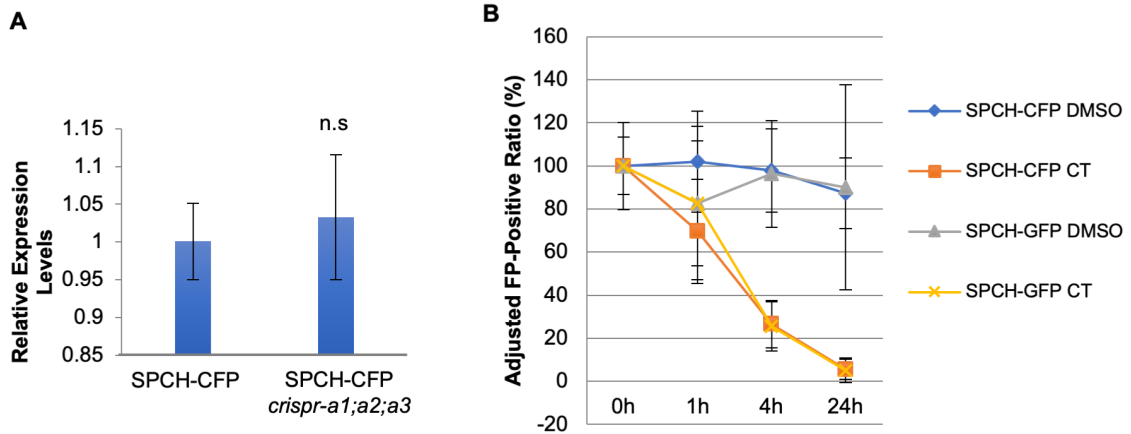

82  
83

84 **Fig. S4. Differential influences of defective PP2A on SPCH transcripts and**  
85 **proteins.**

86 (A) Quantitative real-time PCR assay for transcript levels of SPCH-CFP in the WT  
87 and *crispr-a1;a2;a3*, respectively. *ACTIN2* was used as an internal reference. Three  
88 biological replicates were performed. Data are mean  $\pm$  SD. Student's *t*-test. n.s: non-  
89 significant. (B) Quantification of GFP/CFP-positive cells in *SPCHpro::SPCH-CFP* and  
90 *SPCHpro::SPCH-GFP* 3-dpg cotyledons. Seedlings were treated with DMSO or 50  
91  $\mu$ M CT. Confocal images were captured at 0-, 1-, 4-, and 24-hr after treatment. For  
92 each sample, n=1247-3571 cells in 10-12 individual seedlings were collected for  
93 quantification. Adjusted Ratios were generated by defining the initial percentages of  
94 CFP/GFP-positive cells as 100%, then the relative ratios at each time point were  
95 calculated accordingly. Data are mean  $\pm$  SD.

96  
97

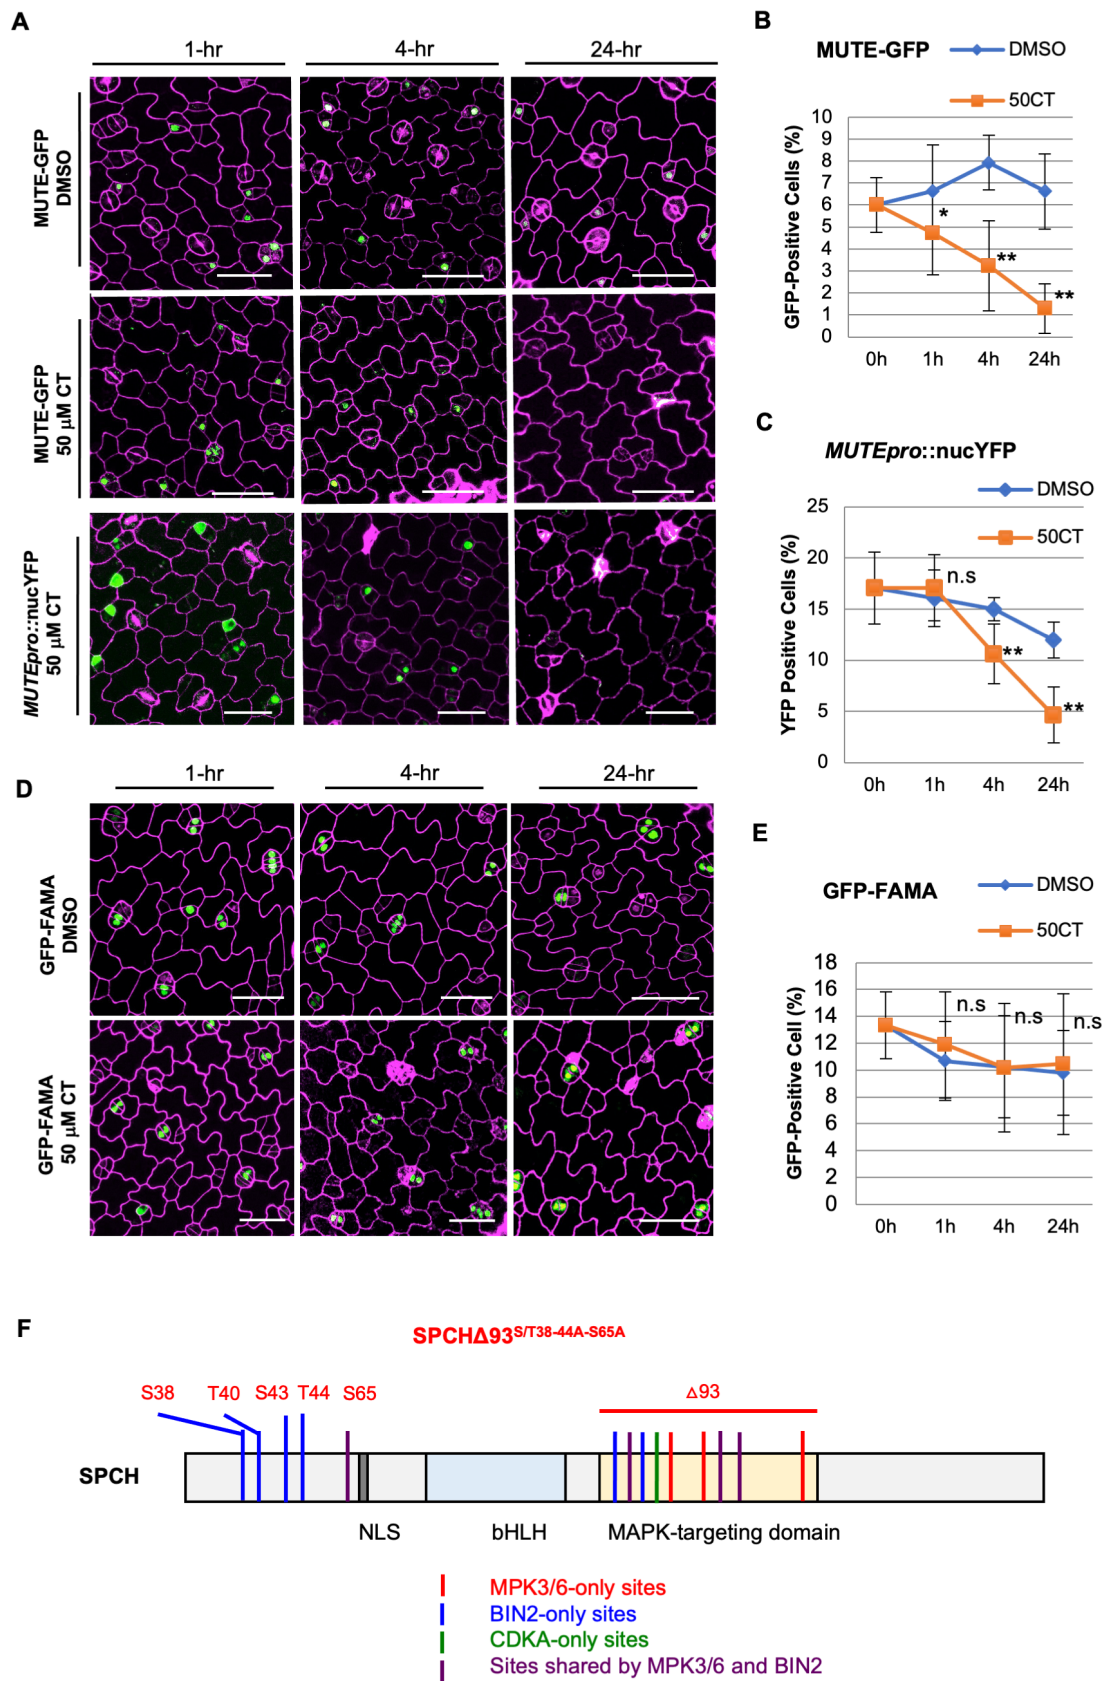

98

99 **Fig. S5. Differential responses of key bHLH transcription factors to defective**  
 100 **PP2A function**

101 (A) Confocal images of 3-dpg adaxial cotyledons expressing translational fusion  
102 MUTE-GFP and transcriptional fusion *MUTEpro::nucYFP*. Cell outlines are visualized  
103 by PI staining (magenta) and GFP expression are in green. Seedlings were treated  
104 with DMSO or 50  $\mu$ M CT for 1-hr, 4-hr, and 24-hr, respectively. (B-C) Quantification  
105 of GFP/YFP-positive cells at different time point in 3-dpg MUTE-GFP, n=965-2888  
106 cells (B) and *MUTEpro::nucYFP*, n=699-2129 cells (C). (D) Confocal images of 3-dpg  
107 seedlings expressing translational fusion GFP-FAMA in responding to DMSO or 50  
108  $\mu$ M CT at 1-hr, 4-hr, and 24-hr, respectively. (E) Quantification of GFP-positive cells  
109 in 3-dpg seedlings expressing GFP-FAMA in responding to DMSO or 50  $\mu$ M CT for  
110 0-hr, 1-hr, 4-hr, and 24-hr. n=794-2256 cells counted for each time point.  
111 Quantification data (B, C, and E) are mean  $\pm$  SD. \*significantly different from the  
112 DMSO control values (Student's *t*-test, \*P < 0.05, \*\*P < 0.001). n.s: not significant.  
113 Scale bars in (A) and (D) represent 50  $\mu$ m. (F) Diagram for SPCH subdomains with  
114 identified phosphorylation sites (vertical lines, color coded as indicated). NLS,  
115 nuclear localization signal. SPCH $\Delta$ 93<sup>S/T38-44A-S65A</sup> is a variant with the MAPK-targeting  
116 domain deleted ( $\Delta$ 93) and a few N-terminal phosphorylation sites (S/T, S38, T40,  
117 T43, and S65) mutated to Ala to make S/T38-44A-S65A.  
118  
119  
120  
121



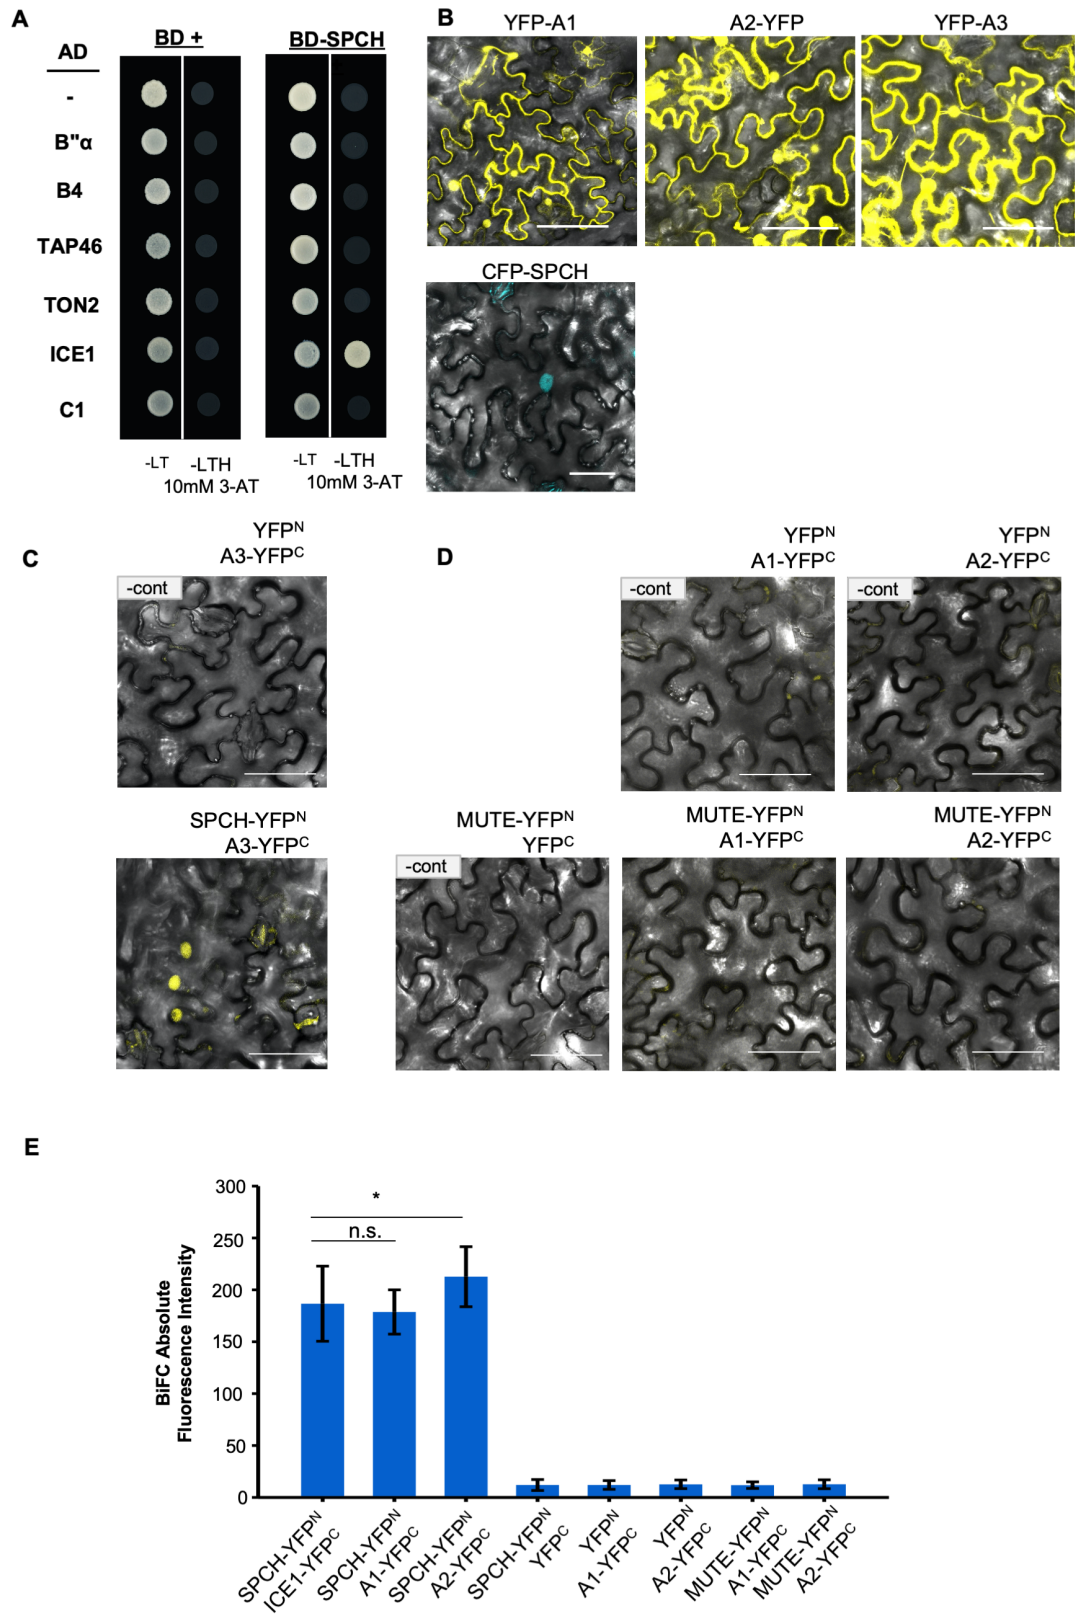

123

124

**Fig. S6. Interaction assays for SPCH with the PP2A subunits**

125

(A) Yeast two-hybrid assay to test BD-SPCH interaction with AD-B'' $\alpha$ /B13, -B'' $\beta$ /B4, -

126

TAP46, -TON2 and -C1. BD and AD empty vectors were used as negative controls,

127 SCRM/ICE1, a known binding partner of SPCH, was used as positive control. Left,  
128 growth controls (-Leu-Trp). Right, interaction tests (-Leu-Trp-His with 10 mM 3-AT).  
129 (B) Confocal images to show transient protein expression patterns of YFP-A1, A2-  
130 YFP, YFP-A3, and CFP-SPCH in tobacco epidermal cells. (C) Confocal images of  
131 BiFC assays. Complemented YFP expression (yellow) was shown when SPCH-YFP<sup>N</sup>  
132 coexpressed with A3-YFP<sup>C</sup>. The YFP<sup>N</sup> co-expressed with A3-YFP<sup>C</sup> was used as a  
133 negative control. (D) Confocal images of BiFC assays to test interactions between  
134 MUTE and the PP2A-A subunits. The expression of half YFPs (YFP<sup>N</sup> and YFP<sup>C</sup>)  
135 were used as negative controls. -cont, negative controls in (C) and (D). Scale bars  
136 represent 50  $\mu$ m in (B-D). (E) Quantification of the absolute fluorescence intensity  
137 levels of YFP obtained from the same confocal settings, e.g. laser intensity and smart  
138 gains, for BiFC assays in (D and Fig. 5B), including positive/negative controls and  
139 testing samples. Data are mean  $\pm$  SD. For each sample, n= 15 cells collected from 3  
140 independent experiments. Student's *t*-test, \*P < 0.05, \*\*P < 0.001. n.s: not significant.  
141

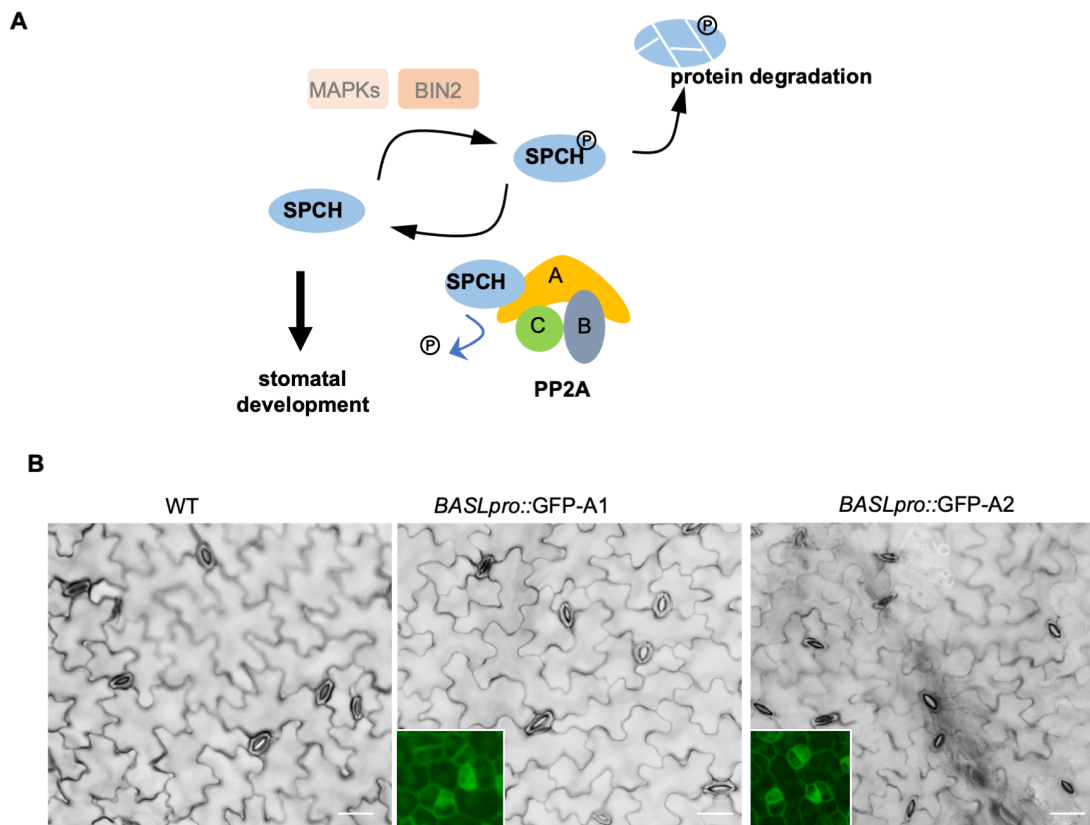

143

144

145 **Fig. S7. PP2A promotes stomatal development by stabilizing the SPCH protein**

146 (A) A working model for PP2A promoting stomatal development by stabilizing the

147 SPCH protein. PP2A might function in opposition to the identified kinases (MAPKs

148 and BIN2) to balance the phosphorylation status of SPCH in the initiation of stomatal

149 lineage cells. (B) DIC images of 5-dpg adaxial side cotyledons of the WT,

150 *BASLpro::GFP-A1*, and *BASLpro::GFP-A2* seedlings. GFP expressions are shown in

151 the insets (green). Scale bars represent 25  $\mu$ m.

152

153

154  
155

**Table S1. Primers used in this study**

| Primer Name     | Sequence (5'-3')                                 | Purpose                     |
|-----------------|--------------------------------------------------|-----------------------------|
| F-RNAi-a1;a2;a3 | TAT CAT CAG ACT CTT CTC AGC ATG TC               | RNAi-a1;a2;a3               |
| R-RNAi-a1;a2;a3 | GGG TTG TTA ACC ATC TCA AGA ACC                  |                             |
| RT-RCN1-F       | CCA TAG TCG ACC AAT CAG TG                       | Real-time PCR for A1        |
| RT-RCN1-R       | CAG TTC ATA GCC AGC AAC C                        |                             |
| RT-PDF1-F       | CCA ATA GTT GAT CAA TCG GTT G                    | Real-time PCR for A2        |
| RT-PDF1-R       | TAC CGA GGC ACT CTA GTA G                        |                             |
| RT-PDF2-F       | ATA GTC GAC CAA GCG GTT G                        | Real-time PCR for A3        |
| RT-PDF2-R       | CCC AAC GAA CAA ATC ACA G                        |                             |
| RT-F-CFP        | ACA ACT ACA TCA GCC ACA ACG                      | Real-time PCR for SPCH-CFP  |
| RT-R-CFP        | CTC GTT GGG GTC TTT GCT CAG                      |                             |
| ACTIN2-F        | TCT TCC GCT CTT TCT TTC CAA GC                   | Real-time PCR control       |
| ACTIN2-R        | ACC ATT GTC ACA CAC GAT TGG TTG                  |                             |
| RT-SPCH-F       | TTC TTT CAC CAT CAA GAT TGG                      | Real-time PCR for SPCH      |
| RT-SPCH-R       | GTA CTG CTC TCT CGT TAA GG                       |                             |
| RT-MUTE-F       | GCT ATC TTT TCA AGT TCT TCA CC                   | Real-time PCR for MUTE      |
| RT-MUTE-R       | GTA TCA AGG CTC ATG TAA CG                       |                             |
| RT-FAMA-F       | CAA ACC GTC CTC TAC TCC                          | Real-time PCR for FAMA      |
| RT-FAMA-R       | CAC TCT TCC AAA TGC TTG G                        |                             |
| RT-ICE1-F       | TGT TCT GTG GTC GTA GAC C                        | Real-time PCR for SCRM/ICE1 |
| RT-ICE1-R       | TCA GGC AGT ATC TCT TGT CC                       |                             |
| F-proSPCH-PmeI  | GCC GTTTAAAC CGA AGT ACT GAT CTT<br>TCT GCT C    | SPCH promoter cloning       |
| R-proSPCH-KpnI  | GGC GGTACC CGT GAT TAG AGA TAT<br>ATC CTT CTC TC |                             |

|                          |                                                         |                                        |
|--------------------------|---------------------------------------------------------|----------------------------------------|
| F-CRISPR-<br>sgRNA1      | GATT GGTGCTTCTTGCAATGGCTG                               | <i>crispr-a1</i>                       |
| R-CRISPR-<br>sgRNA1      | AAAC CAGCCATTGCAAGAAGCACC                               |                                        |
| F-CRISPR-<br>sgRNA2      | GATT GGCC TCAGTTATAA TGGGAA                             | <i>crispr-a2;a3</i>                    |
| R-CRISPR-<br>sgRNA2      | AAAC TTCCCATTATAACTGAGGCC                               |                                        |
| F-Seq-RCN1               | ATG GCT ATG GTA GAT GAA CCG TTG                         | <i>crispr</i> mutant genotyping for A1 |
| R-Seq-RCN1               | CGG CGT AAT CTA GTG CTA CAT AAA TC                      |                                        |
| F-seq2-PDF1              | CTT GAT GAT CCC ATT TAC TTC CTC<br>TTG                  | <i>crispr</i> mutant genotyping for A2 |
| R-Seq-PDF1               | TCT GCA ACA TAC ACA ATC CAA CC                          |                                        |
| F-Seq-PDF2               | GTG GCT GAT GTG TAA TAG GCA AG                          | <i>crispr</i> mutant genotyping for A3 |
| R-Seq-PDF2               | CCT AAA GAT GAC AGT GAC TAG GAC G                       |                                        |
| F-RCN1-NotI              | GCTCC GCGGCCGC ATG GCT ATG GTA<br>GAT GAA CCG TTG       | A1 coding sequence cloning             |
| R-RCN1-Ascl (NO<br>STOP) | A GGCGCGCC GGA TTG TGC TGC TGT<br>GGA AC                |                                        |
| F-PDF1-NotI              | GCTCC GCGGCCGC ATG TCT ATG ATC<br>GAT GAG CCG TTG       | A2 coding sequence cloning             |
| R-PDF1-Ascl (NO<br>STOP) | A GGCGCGCC GCT AGA CAT CAT CAC<br>ATT GTC AAT AGA TTG   |                                        |
| F-PDF2-NotI              | GCTCC GCGGCCGC ATG TCT ATG GTT<br>GAT GAG CCT TTA TAC C | A3 coding sequence cloning             |
| R-PDF2-Ascl (NO<br>STOP) | A GGCGCGCC GCT AGA CAT CAT CAC<br>ATT GTC AAT AG        |                                        |

|                                   |                                                               |                                      |
|-----------------------------------|---------------------------------------------------------------|--------------------------------------|
| F-PP2A-C1-NotI                    | GCTCC GCGGCCGC ATG CCG TTA AAC<br>GGA GAT CTC G               | PP2A-C1 coding sequence cloning      |
| R-PP2A-C1-Ascl                    | A GGCGCGCC CAA AAA ATA ATC AGG<br>GGT CTT GCG C               |                                      |
| F-TAP46-NotI                      | GCTCC GCGGCCGC ATG GGT GGT TTG<br>GCT ATG G                   | TAP46 coding sequence cloning        |
| R-TAP46-Ascl (-<br>STOP)          | A GGCGCGCC GCC ACA AGG TGT GAG<br>TTT CTT G                   |                                      |
| F-B'' $\alpha$ -NotI              | GCTCC GCGGCCGC ATG GAA ATC GAT<br>GGT GGA AAC GAT G           | B'' $\alpha$ coding sequence cloning |
| R- B'' $\alpha$ -Ascl (-<br>STOP) | A GGCGCGCC AAA TGG AGA TTC GAG<br>TGG TTC ATC C               |                                      |
| F-TON2-NotI                       | GCTCC GCGGCCGC ATG TAT AGC GGA<br>TCT AGC GAT GGT G           | TON2 coding sequence cloning         |
| R-TON2-Ascl (-<br>STOP)           | A GGCGCGCC CTG AGA CTC TTC CTC<br>AGG TGG T                   |                                      |
| F-B4-NotI                         | GCTCC GCGGCCGC ATG TTT AAG AAA<br>ATC ATG AAA GGT GGG C       | B4 coding sequence cloning           |
| R-B4-Ascl (no<br>stop)            | A GGCGCGCC GGA AGT GAT CAT ATG<br>ATC TTC TTC TCC             |                                      |
| F-SPCH-38-40-43-<br>44A           | GGTGCCGGAGAGATAGCTCCGGCAGCTG<br>CAGCTGCACCTAAAGATGG AACCACAAG | SPCH site-mutation                   |
| R-SPCH-38-40-43-<br>44A           | CCATCTTTAGGTGCAGCTGCAGCTGCCG<br>GAGCTATCTCTCCGGCACCTTCAAGAC   |                                      |
| F-SPCH-65A                        | GGATCAAGATTATGAAAACCTCAGCTCCTA<br>AGAGGAAAAAGCAAAG            | SPCH site-mutation                   |
| R-SPCH-65A                        | CTTTGCTTTTTCTCTTAGGAGCTGAGTTT<br>TCATAATCTTGATCC              |                                      |

|              |                                        |                     |
|--------------|----------------------------------------|---------------------|
| F-proPP2AA1  | GTC TTG TTT TGT TTG TGC TTT CC         | A1 promoter cloning |
| R-proPP2AA1  | CTT ATG TGA AAG TTC GAA TCA AAT<br>CAC |                     |
| F-proPP2AA2  | CGT ATT CAT AGT TCC TGA GAT TGA G      | A2 promoter cloning |
| R-proPP2AA2  | CTT CAA CAA CAC CAA CAA CAA AAT<br>TAC |                     |
| F-proPP2AA3  | GTT GTA CAG TTG CAT ATG TGT GTG        | A3 promoter cloning |
| R2-proPP2AA3 | GTC GAT AAG CAC AGC AAT CGG            |                     |

156  
157  
158  
159
